# Supplementary material for: Development and validation of a prehospital prediction model for acute traumatic coagulopathy
Source: Springer Nature journal article supplement (doi:10.1186/s13054-016-1541-9), 2016-11-15
Supplement: MOESM1 [file 11053964]

**Table S1:** Missing and non-missing variables employed in imputation equations

|                                             | Derivation cohort<br>(N=1963) |                  |                          | Validation cohort<br>(N=285) |                  |                          |
|---------------------------------------------|-------------------------------|------------------|--------------------------|------------------------------|------------------|--------------------------|
|                                             | Missing<br>N (%)              | Imputation model |                          | Missing<br>N (%)             | Imputation model |                          |
|                                             |                               | Imputed          | Non-missing<br>covariate |                              | Imputed          | Non-missing<br>covariate |
| Age                                         | 0                             |                  | X                        | 0                            |                  | X                        |
| Sex                                         | 3 (0.2)                       | X                |                          | 0                            |                  | X                        |
| Race                                        | 37 (1.9)                      | X                |                          | 0                            |                  | X                        |
| Hispanic ethnicity                          | 37 (1.9)                      | X                |                          | 8 (2.8)                      | X                |                          |
| Transfer status                             | 0                             |                  | X                        | 0                            |                  | X                        |
| Time from injury to ED arrival              | 330 (16.8)                    | X                |                          | 0                            |                  | X                        |
| Year                                        | 0                             |                  | X                        | 0                            |                  | X                        |
| Mechanism of injury                         | 0                             |                  | X                        | 0                            |                  | X                        |
| Pre-hospital vital signs                    |                               |                  |                          |                              |                  |                          |
| First systolic blood pressure               | 304 (15.5)                    | X                |                          | 31 (10.9)                    | X                |                          |
| First heart rate                            | 200 (10.2)                    | X                |                          | 35 (12.3)                    | X                |                          |
| First respiratory rate                      | 416 (21.2)                    | X                |                          | 62 (21.8)                    | X                |                          |
| First Glasgow Coma Score                    | 364 (18.5)                    | X                |                          | 68 (23.9)                    | X                |                          |
| Lowest systolic blood pressure <sup>a</sup> | —                             | —                | —                        | 31 (10.9)                    | X                |                          |
| Pre-hospital interventions                  |                               |                  |                          |                              |                  |                          |
| Cardiopulmonary resuscitation               | 0                             |                  | X                        | 0                            |                  | X                        |
| Chest decompression                         | 0                             |                  | X                        | 0                            |                  | X                        |
| Intubation                                  | 0                             |                  | X                        | 0                            |                  | X                        |
| IV fluid <sup>a</sup>                       | —                             | —                | —                        | 43 (15.1)                    | X                |                          |
| First measured ED vital signs               |                               |                  |                          |                              |                  |                          |
| Systolic blood pressure                     | 12 (0.6)                      | X                |                          | 4 (1.4)                      | X                |                          |
| Heart rate                                  | 10 (0.5)                      | X                |                          | 0                            |                  | X                        |
| Temperature                                 | 297 (15.1)                    | X                |                          | 25 (8.8)                     | X                |                          |
| Injury severity score                       | 54 (2.8)                      | X                |                          | 15 (5.3)                     | X                |                          |
| Maximum abdominal AIS                       | 54 (2.8)                      | X                |                          | 15 (5.3)                     | X                |                          |
| Admission INR                               | 0                             |                  | X                        | 0                            |                  | X                        |
| Acute traumatic coagulopathy                | 0                             |                  | X                        | 0                            |                  | X                        |
| Death before discharge                      | 0                             |                  | X                        | 0                            |                  | X                        |
| Hospital length of stay                     | 2 (0.1)                       | X                |                          | 0                            |                  | X                        |

<sup>a</sup> Variable unavailable for development cohort.

Abbreviations: AIS, abbreviated injury score; ED, emergency department; INR, international normalized ratio
