# Supplementary material for: Development and validation of a prehospital prediction model for acute traumatic coagulopathy
Source: Springer Nature journal article supplement (doi:10.1186/s13054-016-1541-9), 2016-11-15

**Figure S1.** Schematic diagram of “majority rules” model selection algorithm

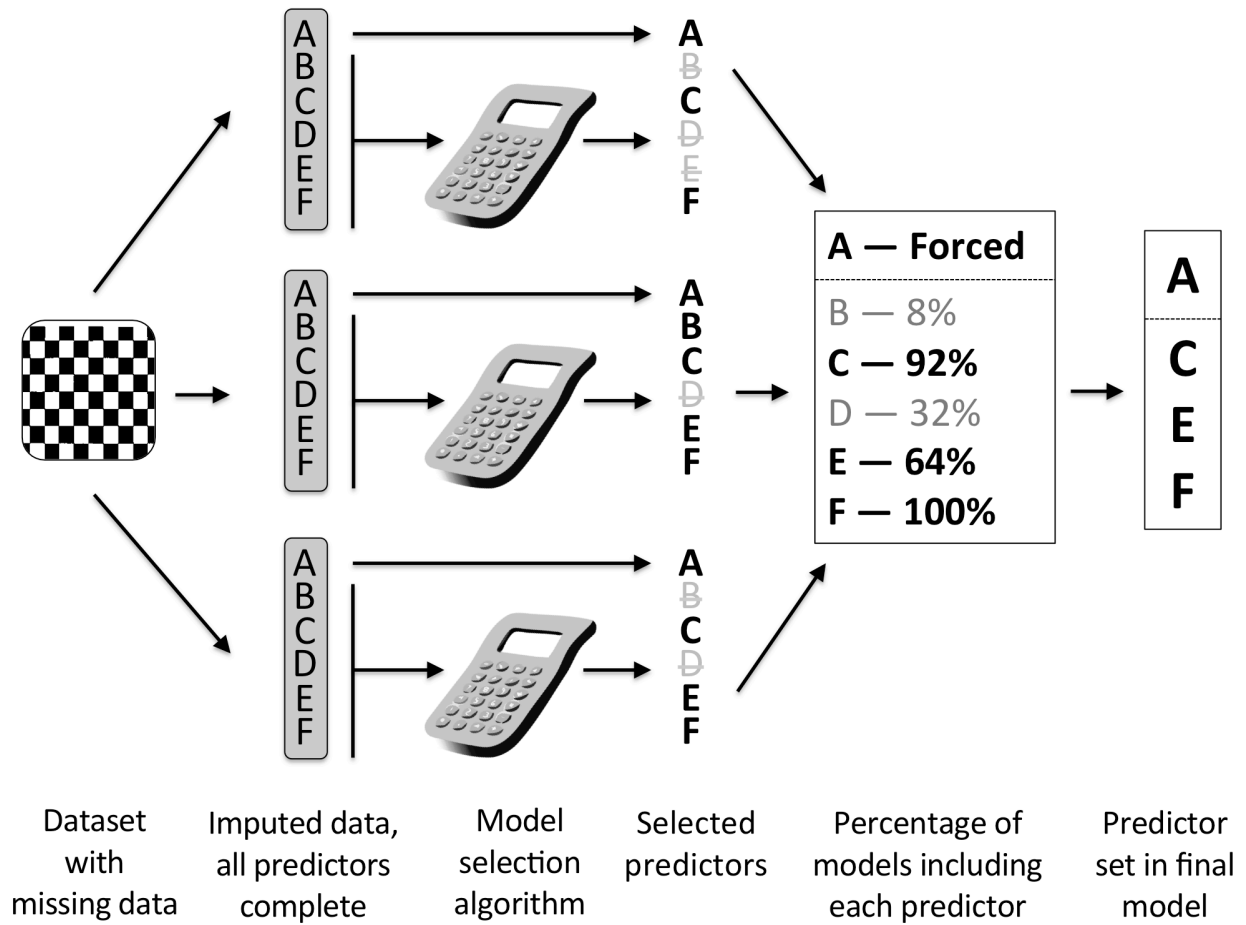

Supplement: MOESM2 [file 11053964]
