# Supplementary material for: Development and validation of a prehospital prediction model for acute traumatic coagulopathy
Source: Springer Nature journal article supplement (doi:10.1186/s13054-016-1541-9), 2016-11-15
Supplement: MOESM3 [file 11053964]

**Figure S2.** Patient enrollment flow diagram for derivation cohort.

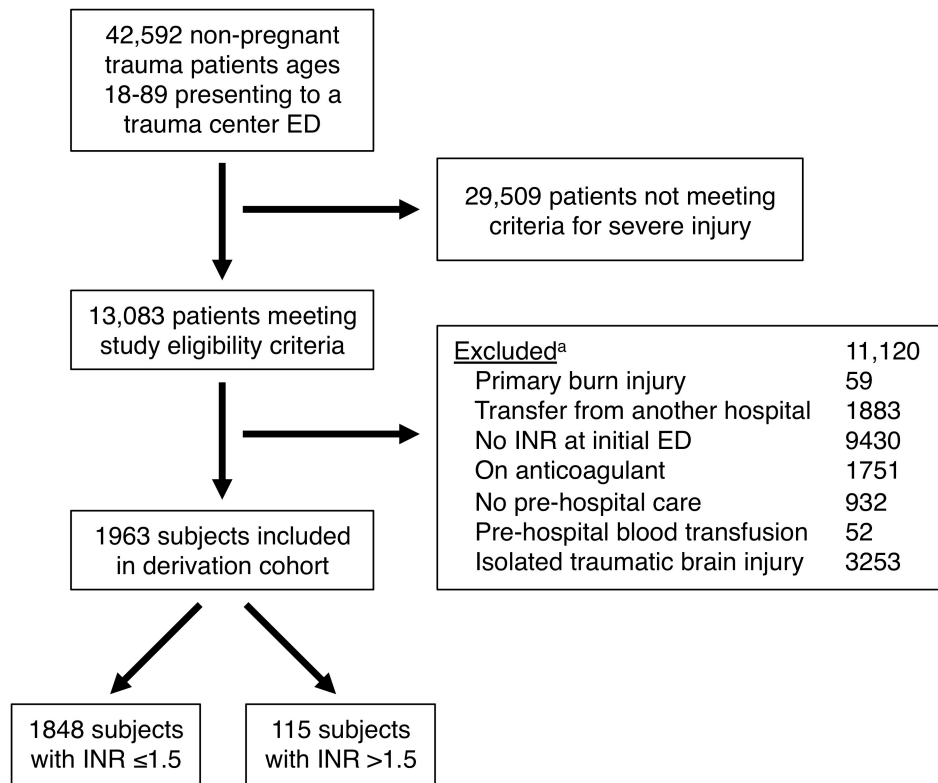

<sup>a</sup> Some patients had >1 reason for exclusion.

Abbreviations: ED, emergency department; INR, international normalized ratio.

**Figure S3.** Patient enrollment flow diagram for validation cohort.

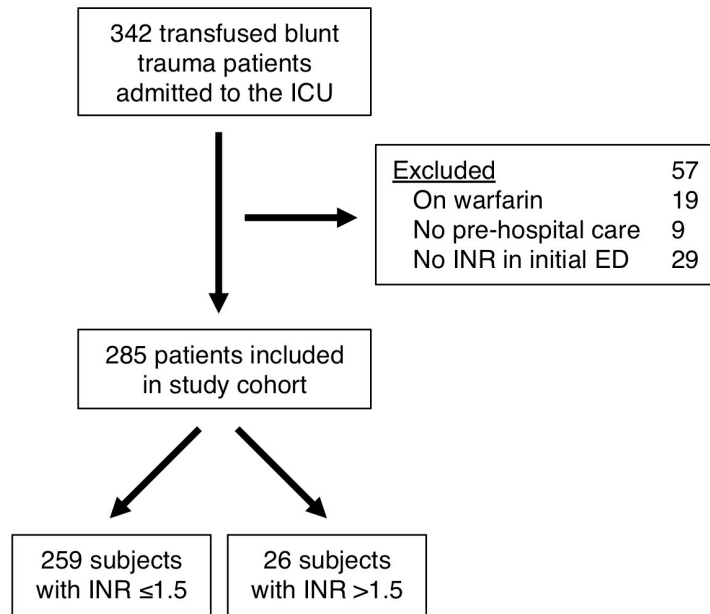

Abbreviations: ED, emergency department; INR, international normalized ratio.
